# Supplementary material for: Genetics, Receptor Binding, Replication, and Mammalian Transmission of H4 Avian Influenza Viruses Isolated from Live Poultry Markets in China
Source: PubMed Central journal article supplement (PMC4719592; doi:10.1128/jvi.02692-15), 2016-01-15
Supplement: JVI.02692-15_zjv999091247so1.pdf [file JVI.02692-15_zjv999091247so1.pdf]

# PB2

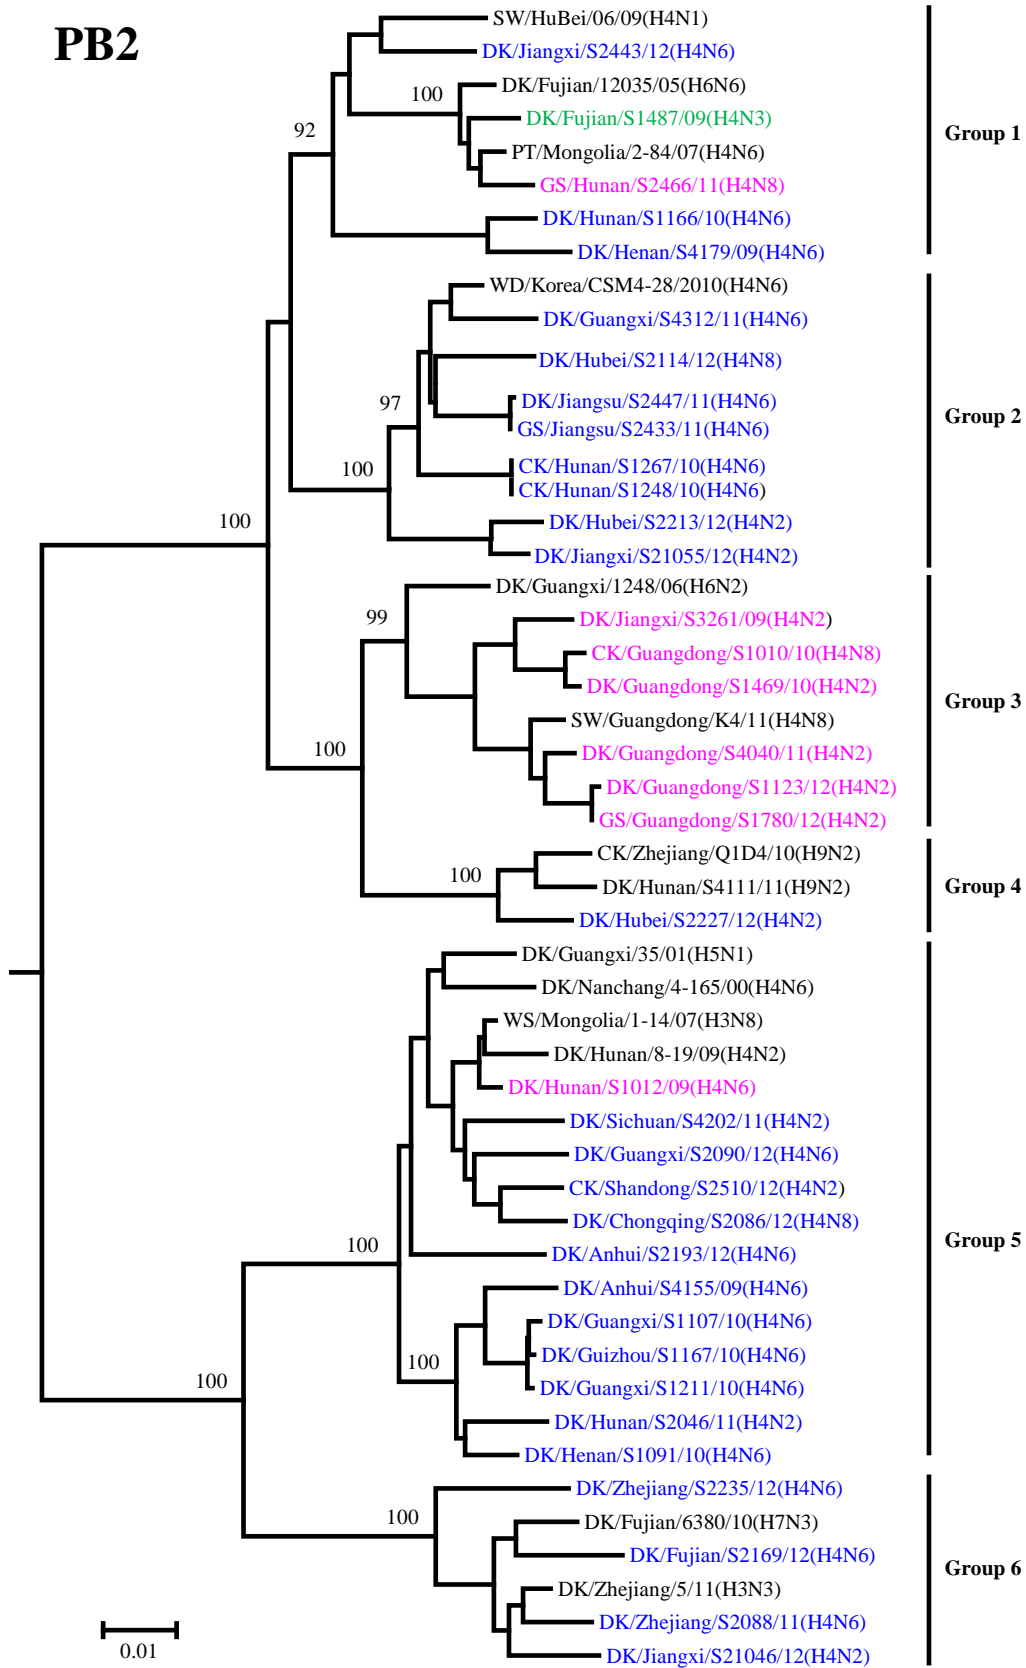

Fig. S1A

# PB1

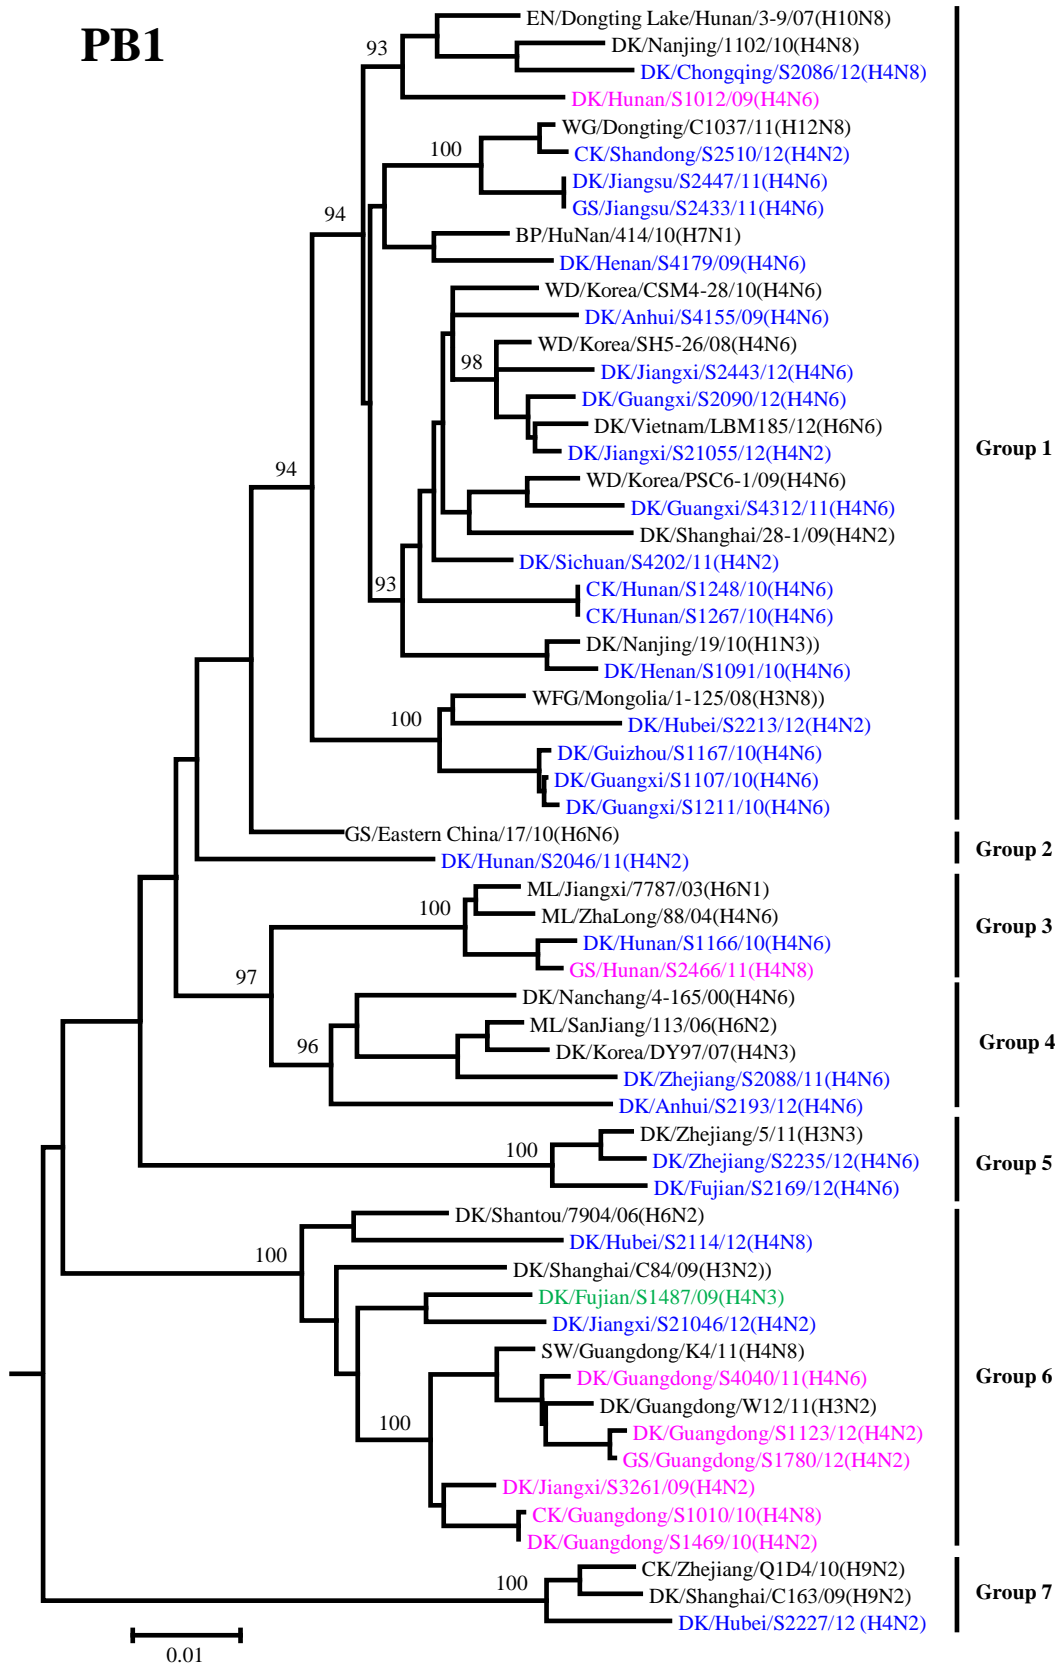

Fig. S1B

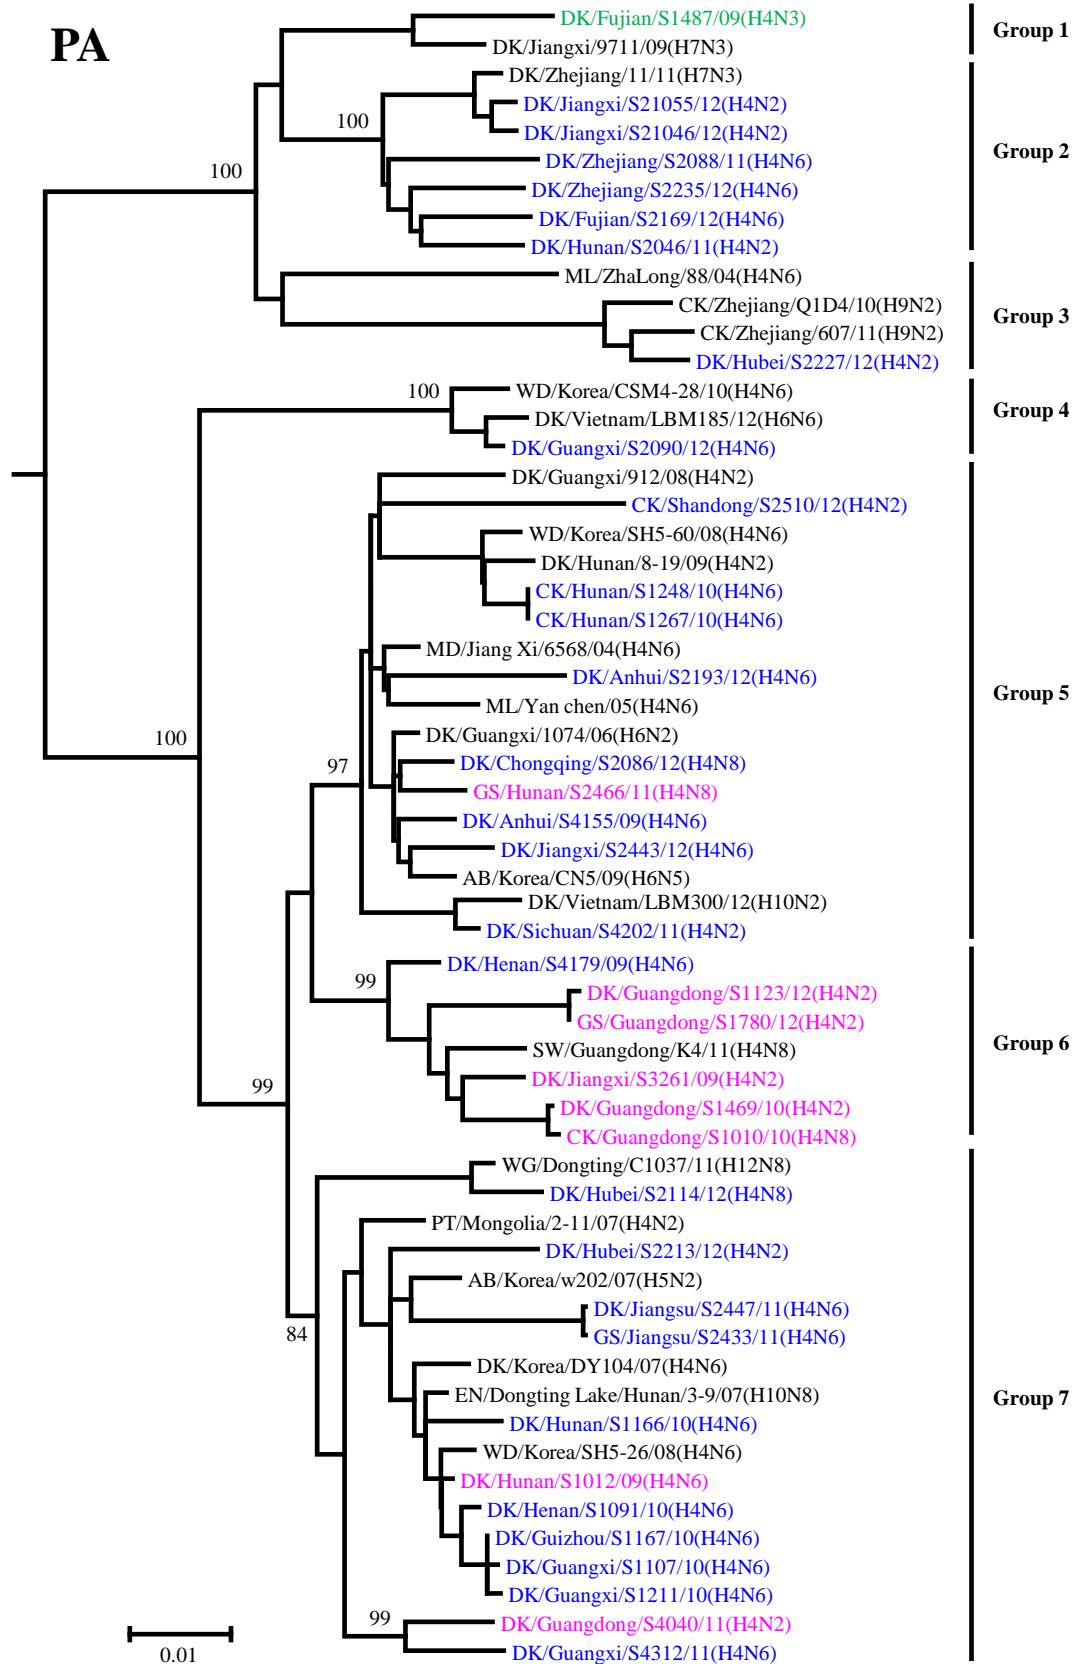

Fig. S1C

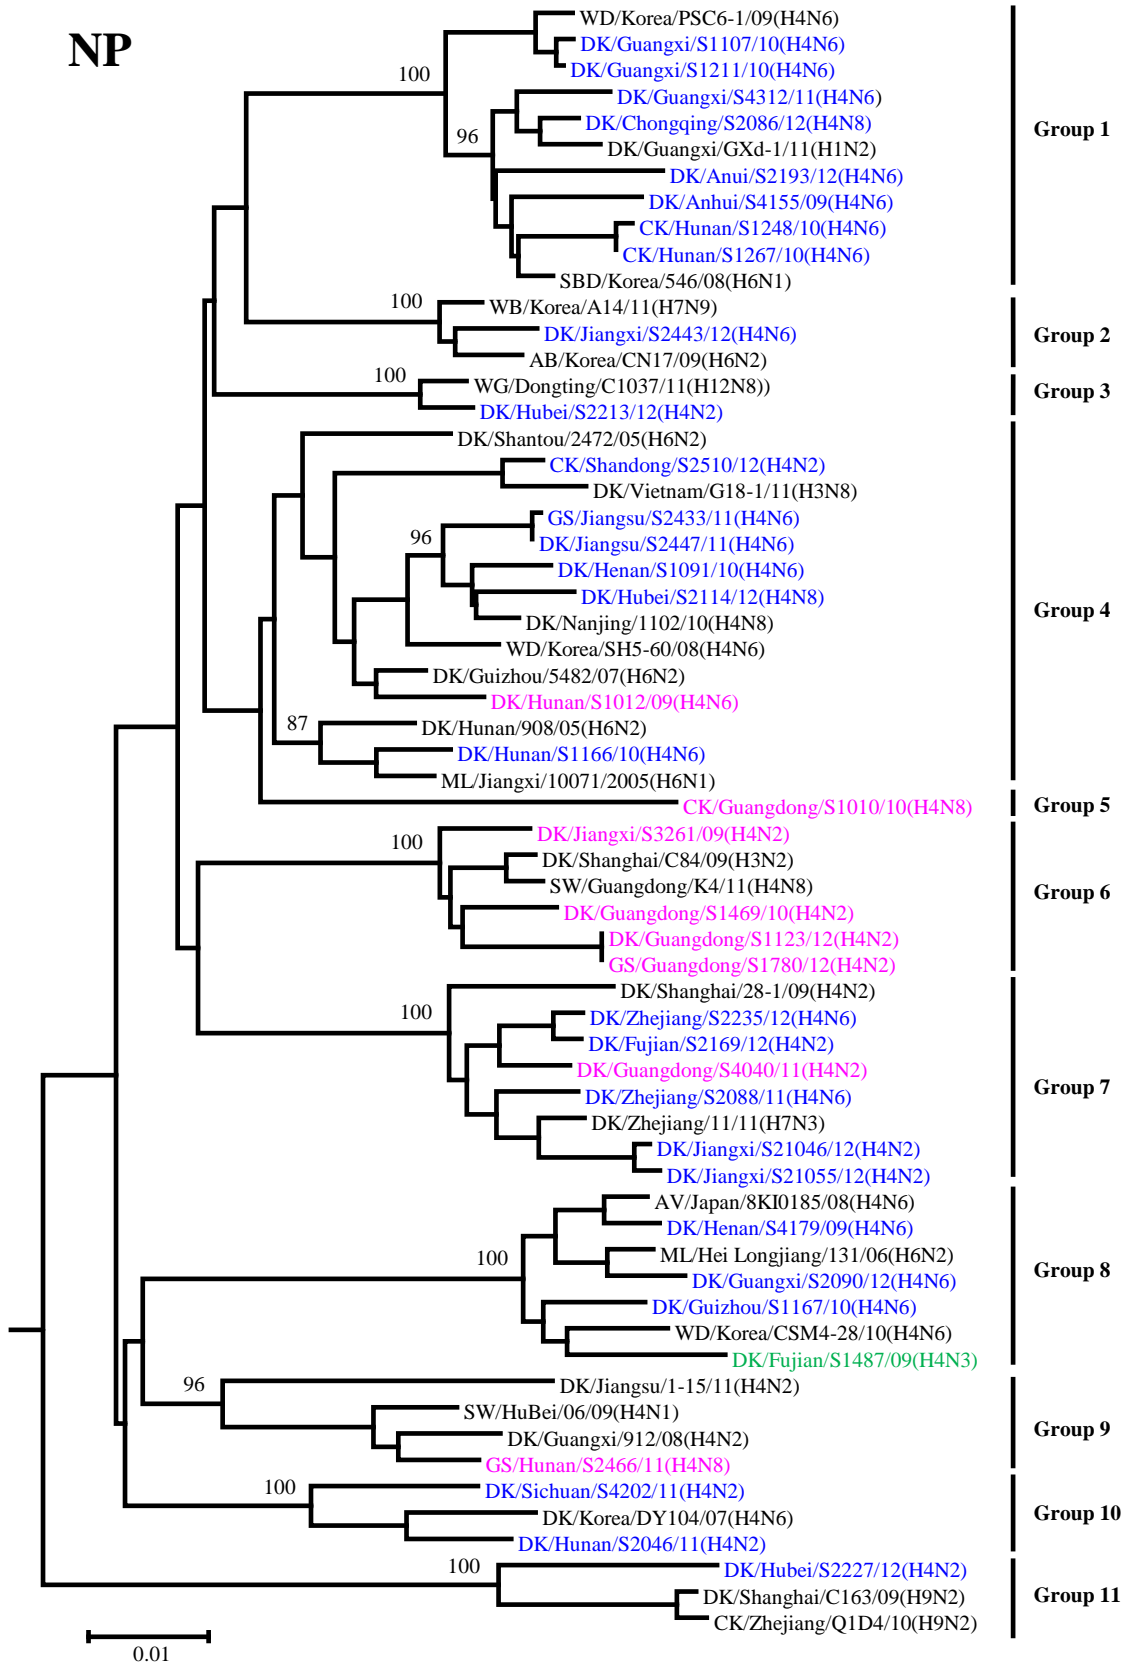

Fig. S1D

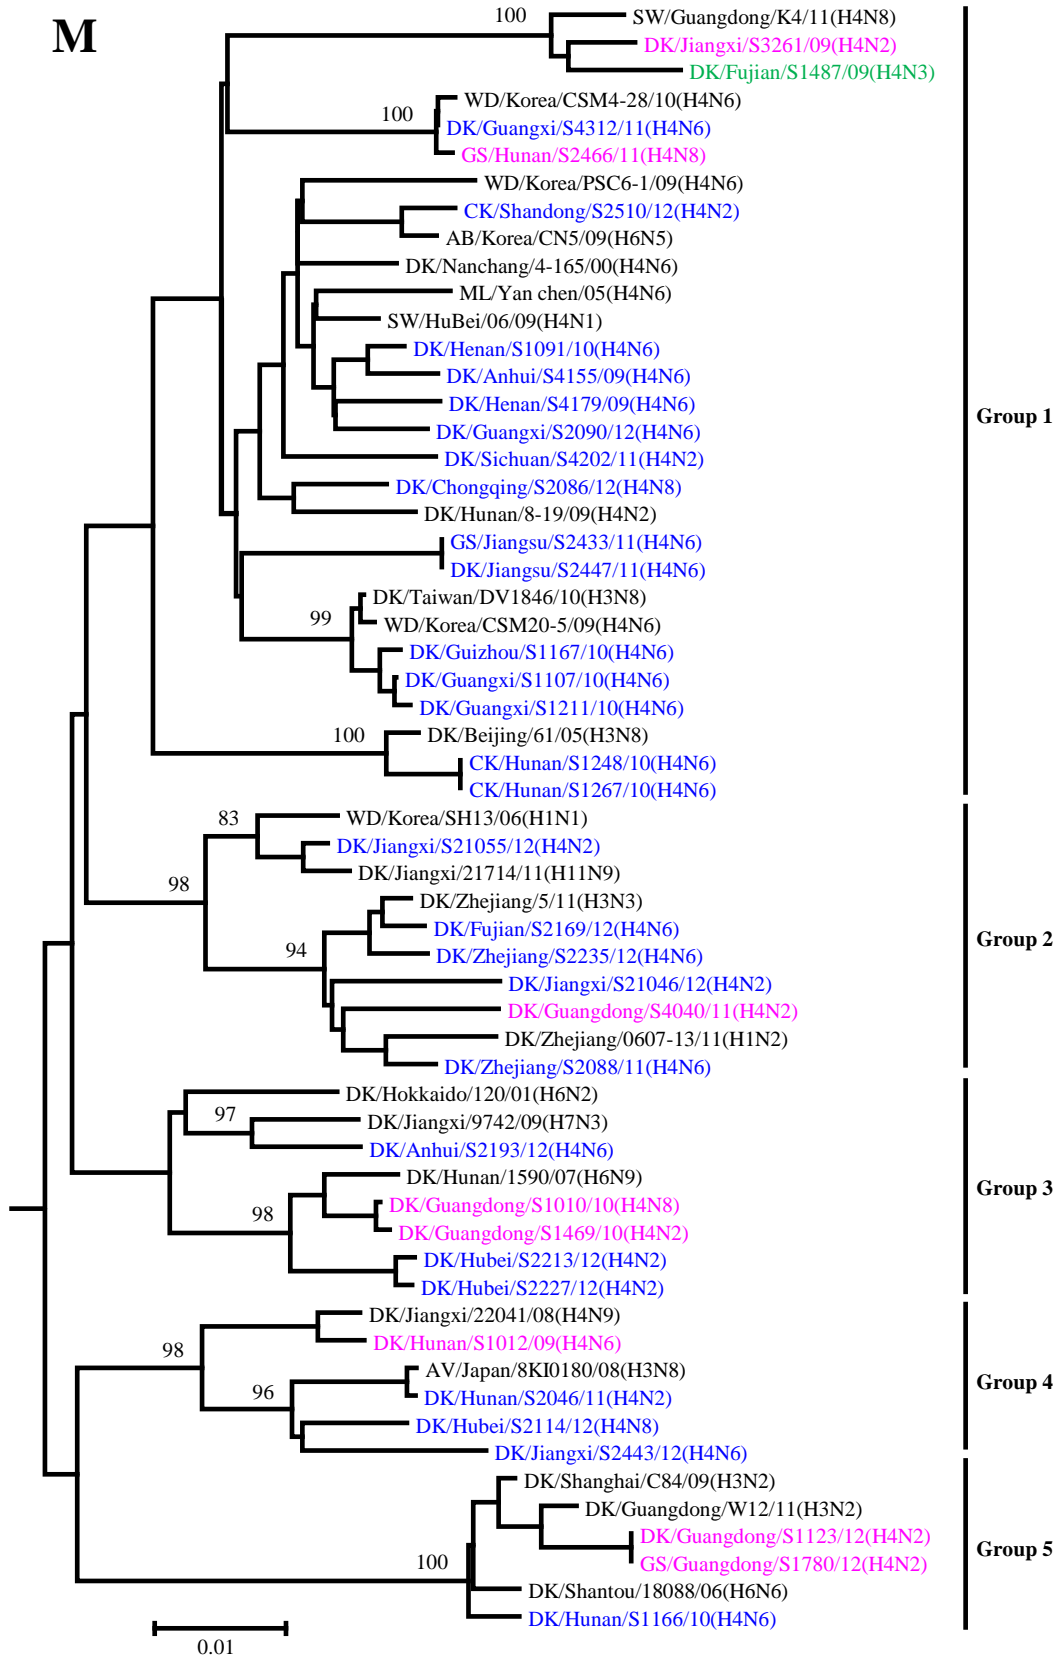

Fig. S1E

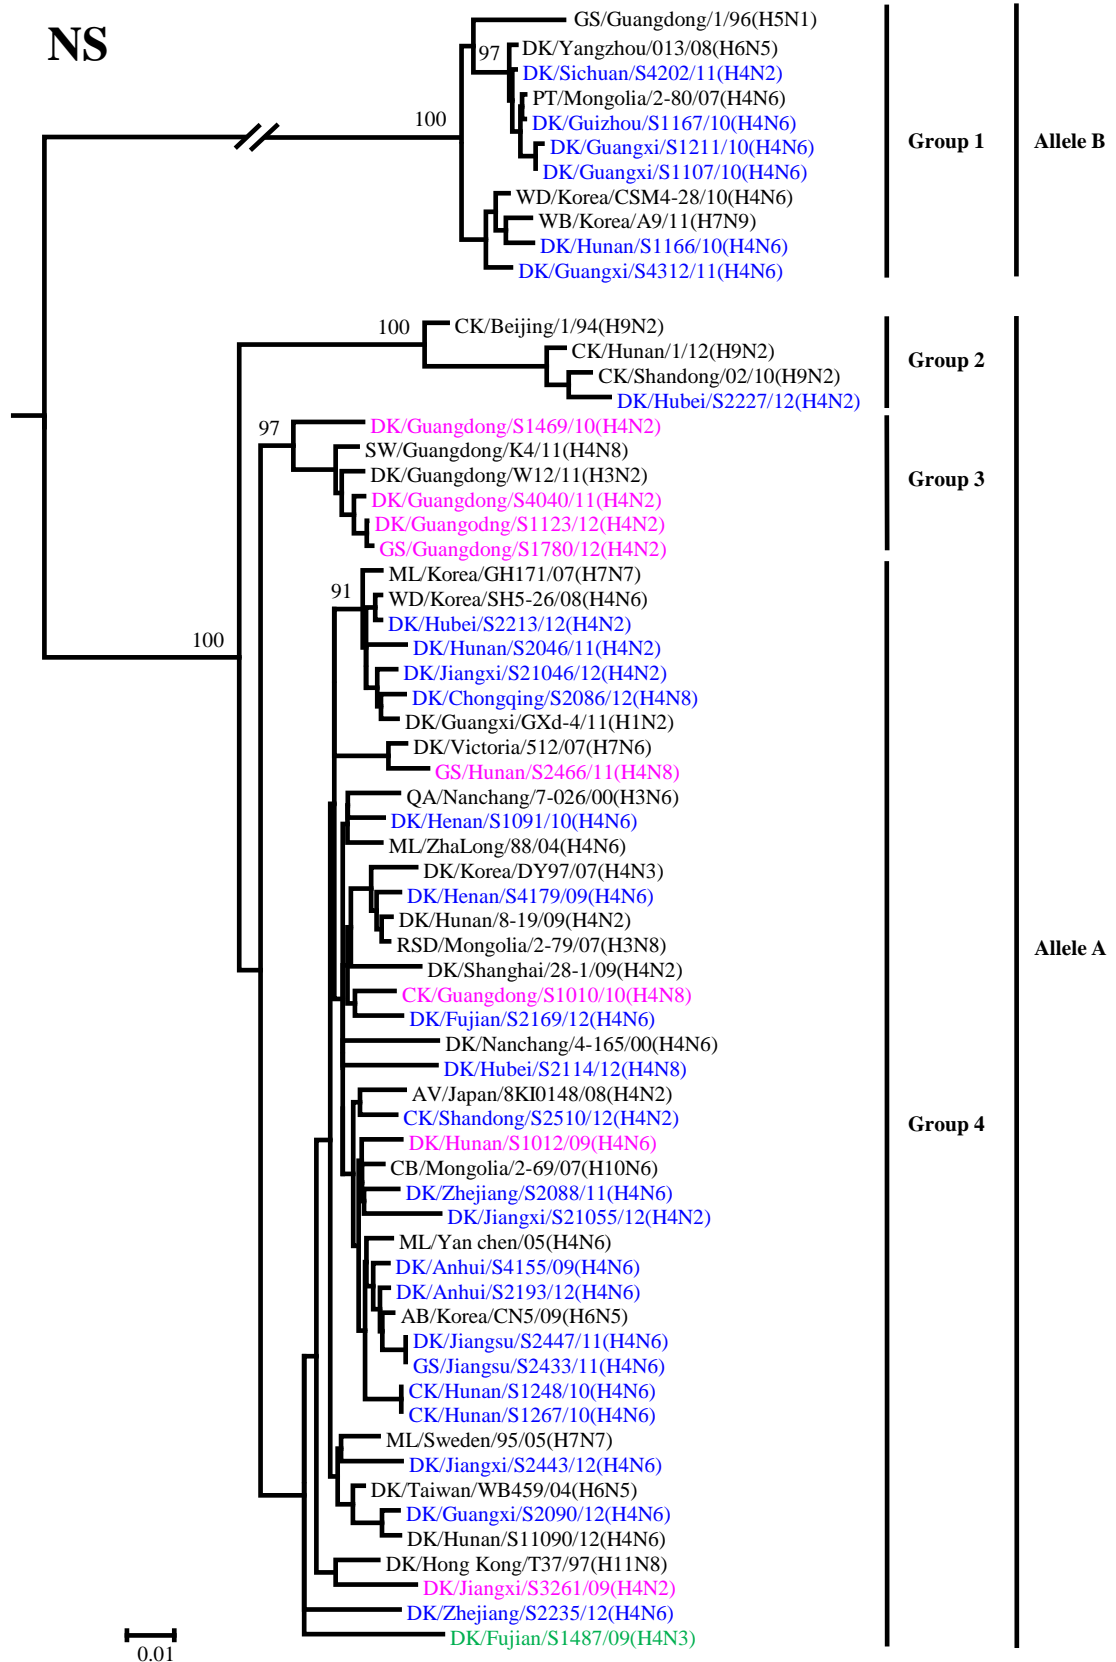

Fig. S1F

**Fig. S1 Phylogenetic analyses of the six internal genes of H4 avian influenza viruses isolated from live poultry markets in China between 2009 and 2012.** Phylogenetic trees were generated by using the neighbor-joining method of the MEGA5.0 software package. The regions of nucleotide sequence used for the phylogenetic analyses were: PB2, 37-2289; PB1, 25-2233; PA, 25-2167; NP, 46-1526; M, 26-1007; and NS, 27-859. The phylogenetic trees of PB2 (A), PB1 (B), PA (C), NP (D), M (E), and NS (F) were rooted to A/equine/Prague/1/1956 (H7N7). The colors of the virus names in the phylogenetic trees match with the colors of their HA genes. Abbreviations: AB, aquatic bird; AV, avian; BP, baer's pochard; CB, canvasback; CK, chicken; DK, duck; EN, environment; GS, goose; MD, migratory duck; ML, mallard; PT, pintail; QA, quail; RSD, ruddy shelduck; SBD, spot-billed duck; SW, swine; WB, wild bird; WD, wild duck; WFG, white-fronted goose; WG, wild goose; WS, whooper swan.
